# Supplementary material for: EspF is crucial for Citrobacter rodentium-induced tight junction disruption and lethality in immunocompromised animals
Source: PubMed Central journal article supplement (PMC6623547; doi:10.1371/journal.ppat.1007898), 2019-06-28

**A**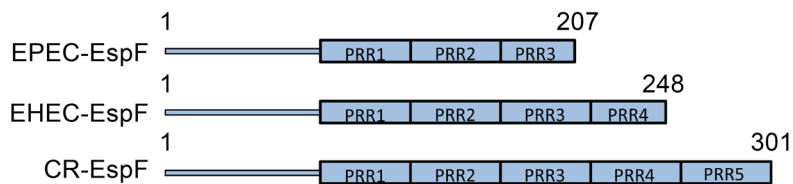**B**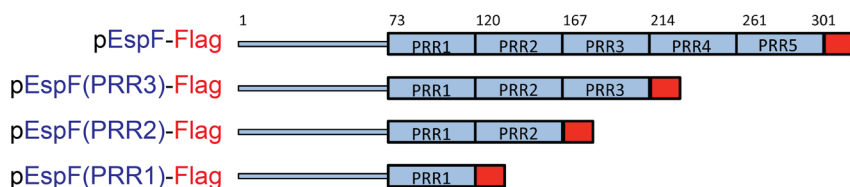**D**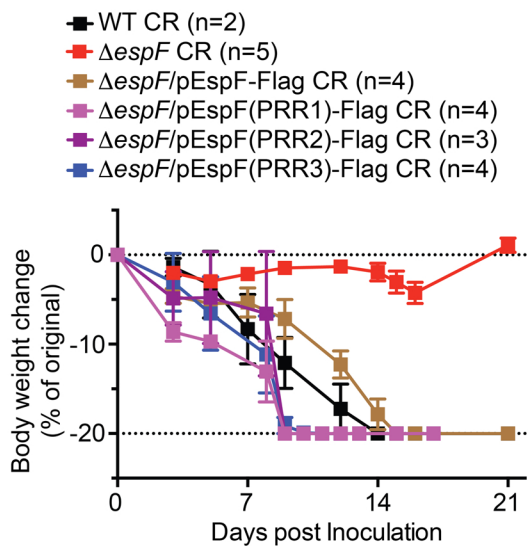**C**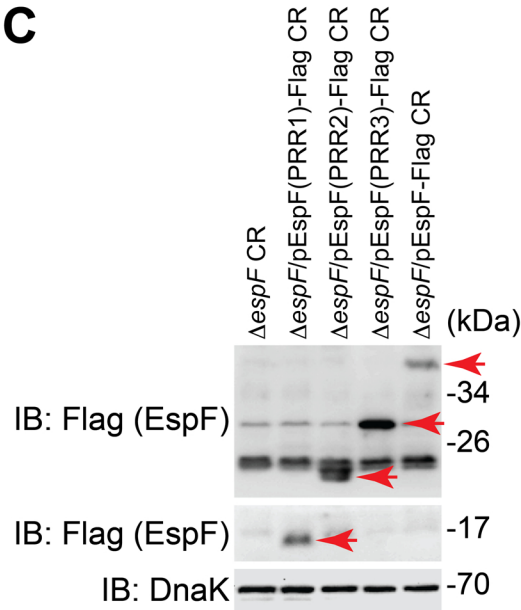**E**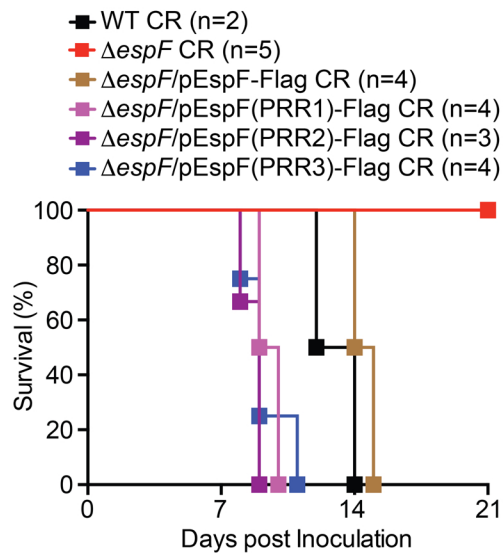

Supplement: ppat.1007898.s009.pdf [file ppat.1007898.s009.pdf]
